# Supplementary material for: Evolutionary Genetic Signatures of Selection on Bone-Related Variation within Human and Chimpanzee Populations
Source: Genes (Basel). 2022 Jan 21;13(2):183. doi: 10.3390/genes13020183 (PMC8871609; doi:10.3390/genes13020183)
Supplement: Supplementary file 1 [file genes-13-00183-s001.zip › Stover et al_GENES_COL1A1_Supp Tables S1-S18_final.xlsx]

## Sheet: Table S1. 1000 Genomes
	Table S1. 1000 Genomes Project population samples and COL1A1 summary data
	Abbrev	Population	Ancestry	Code	Na	Saab	θ (%)c
	ACB	African Caribbean (Barbados)	African	AFR	192	7	0.167829
	ASW	African Southwest (USA)	African	AFR	122	3	0.148006
	BEB	Bengali (Bangladesh)	South Asian	SAS	172	3	0.0990988
	CDX	Dai Chinese, Xishuangbanna (China)	East Asian	EAS	186	2	0.0946289
	CEU	North/Western European, Utah (USA)	European	EUR	198	5	0.0935004
	CHB	Han Chinese, Beijing (China)	East Asian	EAS	206	1	0.122421
	CHS	Han Chinese, South (China)	East Asian	EAS	210	3	0.123552
	CLM	Colombian, Medellin (Colombia)	American	AMR	188	5	0.13223
	ESN	Esan (Nigeria)	African	AFR	198	5	0.148042
	FIN	Finnish (Finland)	European	EUR	198	4	0.0857087
	GBR	British (England & Scotland)	European	EUR	182	2	0.0981555
	GIH	Gujarati, Houston (USA)	South Asian	SAS	206	6	0.0991762
	GWD	Gambian - Mandinka (Gambia)	African	AFR	226	3	0.164764
	IBS	Iberian (Spain)	European	EUR	214	5	0.107798
	ITU	Telugu (UK)	South Asian	SAS	204	3	0.102449
	JPT	Japanese, Tokyo (Japan)	East Asian	EAS	208	4	0.109856
	KHV	Kinh, Ho Chi Minh City (Vietnam)	East Asian	EAS	198	6	0.0935004
	LWK	Luhya, Webuye (Kenya)	African	AFR	198	3	0.160509
	MSL	Mende (Sierra Leone)	African	AFR	170	5	0.152191
	MXL	Mexican, Los Angeles (USA)	American	AMR	128	3	0.128149
	PEL	Peruvian, Lima (Peru)	American	AMR	170	1	0.100926
	PJL	Punjabi, Lahore (Pakistan)	South Asian	SAS	192	6	0.119206
	PUR	Puerto Rican (USA)	American	AMR	208	5	0.134612
	STU	Sri Lankan Tamil (UK)	South Asian	SAS	204	7	0.108658
	TSI	Toscani (Italy)	European	EUR	214	3	0.112418
	YRI	Yoruba, Ibadan (Nigeria)	African	AFR	216	3	0.150664
	aNumber of COL1A1 allele copies
	bNumber of SNPs at amino acid replacement sites
	cWatterson's (1975) estimate of nucleotide diversity (%) at 10,932 intron sites (50 introns minus 5'/3' splice sites)

## Sheet: Table S2. DAMs
	Table S2: Clinical database of COL1A1 DAMs (Disease-Associated Mutations)
	Chr17 position (hg19)	Amino acid change	Domain	Disease	Severity Category	PhyloP
	48278874	Met1	N	OI1	1	7.847
	48278874	Met1	N	OI1	1	7.847
	48278873	Met1	N	OI1	1	9.107
	48278873	Met1	N	OI1	1	9.107
	48278872	Met1	N	osteoporosis	1	7.63
	48278837	Leu13*	N	OI1	1	9.107
	48278811	Gly22Arg	N	OI2	4	2.495
	48278796	Gln27*	N	OI1	1	0.813
	48278784	Gln31*	N	OI1	1	2.863
	48277292	Cys40*	N	OI1	1	4.256
	48277271	Tyr47*	N	OI1	1	4.142
	48277254	Trp53*	N	OI4	2	4.809
	48277213	Lys67*	N	OI1	1	1.732
	48277202	Cys70*	N	OI1	1	1.093
	48277146	Gly89Val	N	OI3/OI4	2	0.892
	48277131	Val94Asp	N	OI4	2	3.717
	48277127	Cys95*	N	OI1	1	2.871
	48276790	Arg120*	N	OI1	1	1.337
	48276622	Pro146Thr	N	OI2	4	7.202
	48276616	Gly148*	N	OI1	1	3.17
	48276589	Gly157*	N	OI1	1	5.516
	48275853	Gln162*	N	OI1	1	9.552
	48275832	Glu169Lys	N	OI1	1	2.968
	48275820	Gly173*	N	OI1	1	3.64
	48275538	Gly191Ala	T	OI1, aneurysms/arterial	1	7.752
	48275530	Gly194Ser	T	OI1	1	7.752
	48275530	Gly194Arg	T	OI1	1	7.752
	48275529	Gly194Asp	T	OI1, EDS	1	7.752
	48275529	Gly194Ala	T	OI3	3	7.752
	48275363	Gly197Ser	T	OI1	1	7.609
	48275363	Gly197Arg	T	OI1, osteoporosis	1	7.609
	48275363	Gly197Cys	T	OI4	2	7.609
	48275362	Gly197Asp	T	OI1, EDS	1	7.609
	48275362	Gly197Ala	T	OI1	1	7.609
	48275345	Gly203Ser	T	OI1	1	7.609
	48275345	Gly203Arg	T	OI4, OI3/OI4	2	7.609
	48275344	Gly203Asp	T	OI2	4	7.609
	48275326	Gly209Asp	T	OI1	1	7.612
	48275318	Gly212Arg	T	OI1/OI4, OI3/OI4	2	7.612
	48275317	Gly212Glu	T	OI4	2	7.612
	48275146	Gly215Ser	T	OI1, EDS	1	6.016
	48275146	Gly215Arg	T	OI1	1	6.016
	48275131	Arg220*	T	OI1	1	9.762
	48275128	Gly221Ser	T	OI1	1	6.016
	48275128	Gly221Cys	T	OI1	1	6.016
	48275119	Gly224Ser	T	OI1, EDS	1	7.736
	48275119	Gly224Cys	T	OI1	1	7.736
	48274594	Gly233Arg	T	OI4	2	7.678
	48274575	Gly239Asp	T	OI4	2	5.962
	48274557	Gly245Glu	T	OI1	1	7.685
	48274551	Pro247Leu	T	OI1	1	4.792
	48274549	Gly248Arg	T	OI3	3	4.859
	48274548	Gly248Glu	T	OI3	3	7.705
	48274424	Gly251Arg	T	OI1	1	7.723
	48274424	Gly251Cys	T	OI3	3	7.723
	48274423	Gly251Asp	T	OI4	2	7.757
	48274415	Gly254Arg	T	OI2/OI3	4	7.757
	48274414	Gly254Glu	T	OI3	3	7.757
	48274396	Gly260Asp	T	OI4	2	7.757
	48274388	Gly263Arg	T	OI1	1	7.757
	48274387	Gly263Glu	T	OI1	1	7.757
	48274387	Gly263Val	T	OI3	3	7.757
	48274379	Gly266Arg	T	OI4	2	7.731
	48274031	Gly269Ser	T	OI1/OI4	2	7.559
	48274030	Gly269Val	T	OI3/OI4	2	5.963
	48274013	Gly275Arg	T	OI4	2	6.03
	48274012	Gly275Asp	T	OI2	4	7.752
	48274003	Gly278Glu	T	OI3/OI4	2	7.752
	48273994	Gly281Asp	T	OI2	4	7.752
	48273986	Gly284Ser	T	OI3	3	7.752
	48273888	Gly287Val	T	OI2	4	6.003
	48273886	Glu288Lys	T	OI1	1	7.752
	48273885	Glu288Val	T	OI2	4	7.956
	48273870	Gly293Asp	T	OI4	2	7.752
	48273870	Gly293Val	T	OI3	3	7.752
	48273861	Gly296Val	T	OI1	1	6.003
	48273853	Gly299Arg	T	OI4	2	7.752
	48273852	Gly299Asp	T	OI, OI3	3	7.752
	48273850	Gln300*	T	OI1	1	4.699
	48273700	Gly311Asp	T	OI3	3	7.794
	48273700	Gly311Val	T	OI3	3	7.794
	48273692	Gly314Arg	T	OI1/OI4	2	7.782
	48273683	Gly317Ser	T	OI4	2	7.794
	48273559	Gly320Val	T	OI1	1	7.739
	48273551	Gly323*	T	OI1	1	7.739
	48273550	Gly323Glu	T	OI3	3	6.017
	48273524	Gly332Arg	T	OI4	2	7.717
	48273523	Gly332Ala	T	OI3	3	7.717
	48273328	Gly338Cys	T	OI1	1	7.739
	48273319	Gly341Arg	T	OI4	2	7.727
	48273319	Gly341Cys	T	OI3	3	7.727
	48273309	Gly344Asp	T	OI3	3	7.739
	48273309	Gly344Val	T	OI2	4	7.739
	48273295	Val349Phe	T	OI1, aneurysms/arterial	1	1.307
	48273292	Gly350Arg	T	OI3	3	7.739
	48273026	Gly353Cys	T	OI4, OI3/OI4	2	6.035
	48273025	Gly353Asp	T	OI2	4	7.765
	48273017	Gly356Cys	T	OI1	1	7.765
	48273011	Gln358*	T	OI1	1	2.17
	48273008	Gly359Arg	T	OI2	4	7.765
	48272999	Gly362Ser	T	OI1/OI4	2	6.044
	48272989	Gly365Ala	T	OI3/OI4	2	7.765
	48272989	Gly365Val	T	OI2	4	7.765
	48272984	Gln367*	T	OI1	1	5.506
	48272980	Gly368Asp	T	OI2	4	7.753
	48272980	Gly368Val	T	OI2	4	7.753
	48272972	Gly371Ser	T	OI3	3	7.753
	48272962	Gly374Ala	T	OI3	3	4.892
	48272954	Gly377Ser	T	OI4	2	7.753
	48272953	Gly377Ala	T	OI3/OI4	2	7.753
	48272945	Gly380Cys	T	OI4	2	6.016
	48272944	Gly380Val	T	OI2/OI3	4	6.027
	48272936	Gly383Ser	T	OI3/OI4	2	7.787
	48272936	Gly383Cys	T	OI2, OI2/OI3	4	7.787
	48272830	Gly389Arg	T	OI2	4	6.038
	48272829	Gly389Ala	T	OI1	1	7.772
	48272827	Ala390Thr	T	OI2, skeletal dysplasia	4	0.475
	48272821	Gly392Arg	T	OI3	3	7.772
	48272820	Gly392Glu	T	OI2	4	6.041
	48272812	Gly395Ser	T	OI3	3	5.989
	48272809	Ala396Thr	T	OI1	1	3.205
	48272803	Gly398Cys	T	OI3/OI4	2	6.044
	48272802	Gly398Asp	T	OI4	2	6.044
	48272802	Gly398Ala	T	OI2	4	6.044
	48272795	Gln400*	T	OI1	1	-0.234
	48272690	Gly401Asp	T	OI2	4	7.808
	48272682	Gly404Ser	T	OI4	2	4.965
	48272682	Gly404Cys	T	OI3	3	4.965
	48272681	Gly404Ala	T	OI4	2	7.82
	48272673	Gly407Cys	T	OI4	2	4.967
	48272664	Gly410Ser	T	OI3	3	6.016
	48272654	Gly413Ala	T	OI3	3	4.909
	48272643	Pro417Ala	T	OI1	1	3.921
	48272636	Gly419Glu	T	OI2	4	6.066
	48272628	Gly422Cys	T	OI2	4	6.05
	48272627	Gly422Ala	T	OI3/OI4	2	4.081
	48272610	Gly428Cys	T	OI2	4	6.032
	48272600	Gly431Val	T	OI2	4	6.037
	48272460	Gly434Val	T	OI2	4	6.088
	48272452	Gly437Cys	T	OI2	4	7.82
	48272451	Gly437Asp	T	OI2	4	6.038
	48272445	Pro439Leu	T	OI4	2	3.902
	48272442	Gly440Ala	T	OI3	3	4.929
	48272411	Glu450Asp	T	OI3	3	-0.368
	48272180	Gly455Cys	T	OI2	4	7.747
	48272179	Gly455Asp	T	OI2	4	7.747
	48272168	Pro459Ser	T	OI4	2	5.602
	48272162	Gly461Ser	T	OI2	4	6.05
	48272153	Gly464Arg	T	OI3	3	4.932
	48272152	Gly464Glu	T	OI2	4	7.773
	48272134	Gly470Ala	T	OI4	2	6.003
	48272134	Gly470Val	T	OI2	4	6.003
	48272129	Arg472*	T	OI1	1	4.005
	48272117	Gly476Arg	T	OI1	1	7.773
	48272117	Gly476Arg	T	OI2	4	7.773
	48272117	Gly476*	T	OI2	4	7.773
	48272098	Gly482Ala	T	OI3	3	7.636
	48271978	Gly491Cys	T	OI4	2	5.96
	48271942	Gly503Cys	T	OI2	4	7.731
	48271798	Gly509Val	T	OI2	4	6.002
	48271762	Gly521Glu	T	OI2	4	4.905
	48271744	Gly527Asp	T	OI1	1	4.906
	48271744	Gly527Ala	T	OI2	4	4.906
	48271736	Gly530Cys	T	OI4, OI3/OI4	2	5.983
	48271727	Gly533Cys	T	OI2	4	4.884
	48271726	Gly533Asp	T	OI2	4	7.731
	48271723	Leu534Gln	T	OI1	1	5.927
	48271718	Gly536Arg	T	OI2	4	5.813
	48271525	Gly545Asp	T	OI2	4	7.564
	48271516	Gly548Ala	T	OI2	4	7.564
	48271498	Gly554Ala	T	OI2	4	7.564
	48271495	Pro555Arg	T	OI1	1	9.544
	48271393	Gly560Arg	T	OI4	2	7.564
	48271393	Gly560Cys	T	OI2	4	7.564
	48271375	Gly566Arg	T	OI2	4	7.564
	48271375	Gly566Arg	T	OI2	4	7.564
	48271366	Gly569Arg	T	OI2	4	7.564
	48271365	Gly569Asp	T	OI2	4	7.564
	48271357	Gly572Arg	T	OI2	4	7.564
	48271345	Gly576*	T	OI1	1	5.488
	48271339	Gly578Ser	T	OI4	2	7.564
	48271330	Gly581Arg	T	OI2	4	7.564
	48271312	Gly587Ser	T	OI2	4	7.515
	48271311	Gly587Ala	T	OI4	2	7.515
	48270399	Gly593Cys	T	OI3/OI4	2	6.979
	48270398	Gly593Asp	T	OI2	4	6.979
	48270398	Gly593Val	T	OI2	4	6.979
	48270384	Arg598*	T	OI, OI1	1	1.684
	48270372	Gly602Arg	T	OI2	4	7.028
	48270362	Gly605Asp	T	OI2	4	3.414
	48270193	Gly614Arg	T	OI2	4	7.712
	48270184	Gly617Arg	T	OI2	4	7.712
	48270054	Gly626Ser	T	OI4	2	7.773
	48270054	Gly626Cys	T	OI2	4	7.773
	48270053	Gly626Asp	T	OI2	4	7.773
	48270045	Gly629Ser	T	OI2	4	7.773
	48270036	Gly632Ser	T	OI2, OI2/OI3	4	7.757
	48270033	Glu633*	T	OI4	2	7.773
	48270030	Glu634*	T	OI1	1	5.631
	48270027	Gly635Ser	T	OI2	4	6.023
	48270017	Gly638Val	T	OI2	4	7.773
	48269880	Gly647Ser	T	OI1/OI4	2	7.745
	48269871	Gly650Arg	T	OI2	4	7.745
	48269853	Gly656Ser	T	OI2	4	7.773
	48269843	Gly659Ala	T	OI3	3	7.773
	48269838	Gln661*	T	OI1	1	4.884
	48269367	Gly668Ser	T	OI2	4	7.552
	48269229	Gly683Ser	T	OI4	2	7.773
	48269219	Gly686Ala	T	OI3	3	6.04
	48269219	Gly686Val	T	OI2	4	6.04
	48269211	Gly689Ser	T	OI3	3	7.773
	48269210	Gly689Asp	T	OI2	4	7.773
	48269201	Gly692Ala	T	OI3	3	7.773
	48269193	Gly695Ser	T	OI2	4	7.773
	48269166	Gly704Cys	T	OI3	3	7.773
	48269149	Lys709=	T	OI1	1	7.773
	48268842	Gly713Ser	T	OI2	4	7.773
	48268824	Gly719Ser	T	OI3	3	7.773
	48268823	Gly719Asp	T	OI2	4	6.044
	48268815	Gly722Ser	T	OI1	1	5.86
	48268811	Ala723Val	T	OI4	2	3.997
	48268800	Gln727*	T	OI4	2	4.816
	48268797	Gly728Arg	T	OI2	4	7.753
	48268787	Gly731Val	T	OI2	4	7.773
	48268778	Gly734Ala	T	OI1/OI4	2	4.917
	48268778	Gly734Val	T	OI2	4	4.917
	48268769	Gly737Asp	T	OI2	4	7.753
	48268761	Gly740Arg	T	OI2	4	6.026
	48268752	Gly743Ser	T	OI2	4	7.773
	48268751	Gly743Asp	T	OI2	4	7.773
	48268751	Gly743Val	T	OI2	4	7.773
	48268276	Gly749Ser	T	OI1	1	7.692
	48268249	Gly758Cys	T	OI4	2	7.692
	48268240	Gly761Ser	T	OI4	2	4.669
	48268239	Gly761Asp	T	OI3	3	7.692
	48268231	Gly764Ser	T	OI2	4	7.619
	48268230	Gly764Val	T	OI2	4	7.6
	48268221	Gly767Asp	T	OI2	4	7.672
	48268213	Gly770Cys	T	OI2	4	5.946
	48268204	Gly773Ser	T	OI3	3	7.692
	48268204	Gly773Cys	T	OI2	4	7.692
	48268195	Gly776Ser	T	OI2	4	7.692
	48267741	Gly800*	T	OI1	1	7.773
	48267714	Gly809Ser	T	OI2	4	7.773
	48267705	Gly812Ser	T	OI4	2	7.773
	48267696	Gly815Ser	T	OI4	2	7.773
	48267695	Gly815Ala	T	OI1	1	7.773
	48267695	Gly815Val	T	OI2	4	7.773
	48267460	Gly821Arg	T	OI2	4	7.773
	48267457	Gln822*	T	OI1	1	6.73
	48267451	Gly824Arg	T	OI1	1	7.773
	48267451	Gly824Cys	T	OI2	4	7.773
	48267441	Gly827Asp	T	OI2	4	7.773
	48267423	Gly833Val	T	OI2	4	7.773
	48267414	Gly836Ala	T	OI3	3	7.773
	48267406	Gly839Arg	T	OI2	4	7.773
	48267405	Gly839Asp	T	OI2/OI3	4	7.773
	48267397	Gly842Arg	T	OI2	4	7.773
	48267396	Gly842Asp	T	OI2	4	7.773
	48267388	Gly845Arg	T	OI, OI2	4	7.773
	48267388	Gly845Arg	T	OI2	4	7.773
	48267379	Gly848Arg	T	OI2	4	7.773
	48267369	Gly851Asp	T	OI2	4	6.04
	48267273	Gly854Arg	T	OI4	2	7.731
	48267273	Gly854Cys	T	OI3	3	7.731
	48267272	Gly854Val	T	OI2	4	7.731
	48267270	Asn855His	T	OI2	4	1.274
	48267254	Gly860Ala	T	OI3/OI4	2	7.731
	48267246	Gly863Cys	T	OI2/OI3	4	7.731
	48267245	Gly863Val	T	OI2	4	7.731
	48267236	Gly866Ala	T	OI1/OI4	2	7.731
	48267228	Gly869Cys	T	OI2	4	7.731
	48267092	Gly872Ala	T	OI4	2	7.731
	48267084	Gly875Ser	T	OI2	4	7.731
	48267075	Gly878Ser	T	OI2	4	6.002
	48267074	Gly878Asp	T	OI3	3	7.731
	48267065	Gly881Val	T	OI2	4	7.718
	48267057	Gly884Ser	T	OI2	4	6.002
	48267048	Gly887Ser	T	OI2	4	6.002
	48266881	Gly896Cys	T	OI2	4	7.606
	48266880	Gly896Asp	T	OI2	4	5.887
	48266836	Gly911Ser	T	OI3	3	7.606
	48266817	Gly917Glu	T	OI2	4	7.575
	48266809	Gly920Ser	T	OI2	4	7.606
	48266791	Gly926Cys	T	OI2	4	7.606
	48266772	Gly932Asp	T	OI2	4	7.504
	48266636	Gly944Cys	T	OI2	4	7.575
	48266627	Gly947Cys	T	OI2	4	7.575
	48266618	Gly950Arg	T	OI2	4	5.838
	48266597	Gln957*	T	OI1, EDS	1	1.649
	48266593	Arg958Leu	T	OI1	1	2.427
	48266581	Gly962Asp	T	OI3	3	7.483
	48266545	Gly974Asp	T	OI2	4	5.752
	48266536	Gly977Asp	T	OI2	4	5.783
	48266534	Pro978Ser	T	OI1	1	4.472
	48266370	Gly980Val	T	OI2	4	7.533
	48266356	Gln985*	T	OI1	1	7.561
	48266308	Gly1001Cys	T	OI2	4	7.575
	48266281	Gly1010Ser	T	OI4	2	7.575
	48266271	Gly1013Glu	T	OI2	4	7.575
	48266156	Gly1016Arg	T	OI2	4	7.575
	48266138	Gly1022Ser	T	OI3	3	7.575
	48266137	Gly1022Val	T	OI2	4	7.575
	48266129	Gly1025Arg	T	OI2	4	7.575
	48266126	Arg1026*	T	OI1	1	3.809
	48266120	Gly1028Ser	T	OI4	2	7.575
	48265980	Gly1040Arg	T	OI2	4	7.696
	48265953	Gly1049Ser	T	OI3	3	4.833
	48265944	Gly1052Ser	T	OI2/OI3	4	4.81
	48265943	Gly1052Asp	T	OI2	4	5.874
	48265934	Gly1055Asp	T	OI2	4	7.445
	48265926	Gly1058Ser	T	OI4	2	5.928
	48265917	Gly1061Ser	T	OI4	2	5.984
	48265916	Gly1061Asp	T	OI2	4	5.928
	48265907	Gly1064Ala	T	OI4	2	4.684
	48265903	Asp1065Glu	T	OI1	1	-0.03
	48265510	Gly1070Ser	T	OI1	1	7.289
	48265501	Gly1073Ser	T	OI3	3	7.583
	48265492	Gly1076Cys	T	OI2	4	7.583
	48265483	Gly1079Arg	T	OI2	4	7.583
	48265474	Gly1082Cys	T	OI2	4	7.583
	48265471	Ala1083Thr	T	OI4, glaucoma	2	1.898
	48265465	Gly1085Ser	T	OI4	2	7.583
	48265344	Gly1088*	T	OI4	2	7.773
	48265343	Gly1088Glu	T	OI1	1	7.773
	48265343	Gly1088Ala	T	OI2	4	7.773
	48265335	Gly1091Ser	T	OI2	4	7.773
	48265326	Gly1094Ser	T	OI2	4	7.773
	48265316	Gly1097Val	T	OI2	4	7.773
	48265307	Gly1100Asp	T	OI2	4	7.755
	48265302	Gln1102*	T	OI1	1	1.793
	48265289	Gly1106Ala	T	OI2	4	7.773
	48265281	Gly1109Ser	T	OI2	4	7.773
	48265257	Gln1117*	T	OI1	1	3.95
	48264898	Gly1124Cys	T	OI2	4	7.419
	48264883	Gln1129*	T	OI1	1	4.62
	48264870	Gly1133Glu	T	OI2	4	5.684
	48264847	Arg1141*	T	OI1	1	1.378
	48264483	Gly1142Ser	T	OI2	4	5.884
	48264474	Gly1145Ser	T	OI4	2	7.564
	48264473	Gly1145Asp	T	OI2	4	7.564
	48264455	Gly1151Val	T	OI2	4	5.884
	48264447	Gly1154Arg	T	OI2	4	7.564
	48264437	Gly1157Asp	T	OI1	1	7.564
	48264411	Gly1166Cys	T	OI2, OI2/OI3	4	5.812
	48264402	Gly1169Cys	T	OI2	4	7.564
	48264393	Gly1172Arg	T	OI2/OI3	4	7.564
	48264392	Gly1172Asp	T	OI2	4	7.564
	48264386	Ala1174Val	T	OI3, EDS	3	0.698
	48264384	Gly1175Ser	T	OI3	3	7.564
	48264383	Gly1175Ala	T	OI1	1	7.564
	48264283	Gly1178Ser	T	OI1	1	7.561
	48264282	Gly1178Val	T	OI2	4	7.561
	48264274	Gly1181Ser	T	OI2	4	5.824
	48264264	Gly1184Val	T	OI2	4	5.847
	48264259	Pro1186Ala	T	OI1	1	6.389
	48264256	Gly1187Arg	T	OI3	3	5.847
	48264255	Gly1187Val	T	OI2	4	5.847
	48264246	Gly1190Asp	T	OI1/OI4	2	5.853
	48264232	Gly1195Cys	C	OI1	1	4.773
	48264220	Ser1199Gly	C	OI1	1	1.332
	48264208	Gln1203*	C	OI1	1	2.512
	48264199	Gln1206*	C	OI1	1	3.835
	48264168	Tyr1216Cys	C	OI3	3	3.102
	48264160	Asp1219Tyr	C	OI4	2	7.561
	48264158	Asp1219Glu	C	OI1	1	0.706
	48264127	Glu1230Lys	C	osteoporosis	1	7.413
	48264097	Gln1240*	C	OI1	1	1.02
	48264088	Glu1243*	C	OI4	2	7.561
	48264060	Arg1252His	C	OI1	1	1.432
	48264030	Leu1262Arg	C	OI2	4	8.967
	48264025	Met1264Val	C	OI1, EDS	1	0.905
	48264008	Trp1269*	C	OI1	1	3.825
	48263868	Gly1272Val	C	OI4	2	5.968
	48263860	Trp1275Arg	C	OI3/OI4	2	9.229
	48263859	Trp1275*	C	OI4	2	5.834
	48263858	Trp1275*	C	OI1	1	5.913
	48263858	Trp1275Cys	C	OI3	3	5.913
	48263854	Asp1277His	C	OI2	4	7.728
	48263852	Asp1277Glu	C	OI2	4	0.791
	48263848	Asn1279His	C	OI3	3	5.946
	48263845	Gln1280*	C	OI1	1	9.751
	48263841	Gly1281Val	C	OI2	4	7.728
	48263830	Asp1285Asn	C	OI4	2	7.728
	48263826	Ala1286Asp	C	OI4	2	9.751
	48263818	Val1289Ile	C	OI2	4	7.728
	48263790	Thr1298Asn	C	OI4	2	6.642
	48263790	Thr1298Ile	C	OI4	2	6.642
	48263788	Cys1299Arg	C	OI3	3	9.229
	48263773	Gln1304*	C	OI1	1	3.896
	48263758	Gln1309*	C	OI1	1	1.815
	48263747	Trp1312Cys	C	OI2	4	7.561
	48263716	His1323Tyr	C	OI1	1	9.517
	48263709	Trp1325*	C	OI1	1	7.545
	48263708	Trp1325*	C	OI1	1	7.545
	48263378	Glu1337Lys	C	OI1	1	1.703
	48263378	Glu1337*	C	OI1/OI4	2	1.703
	48263366	Gln1341*	C	OI1	1	0.672
	48263336	Gln1351*	C	OI1	1	9.539
	48263320	Arg1356His	C	OI2/OI3	4	7.561
	48263306	Glu1361Lys	C	OI4	2	2.569
	48263295	Gln1346His	C	OI4	2	5.845
	48263283	Tyr1368*	C	OI1	1	3.882
	48263257	Met1377Thr	C	OI3	3	9.029
	48263233	Lys1385Arg	C	OI3	3	6.046
	48263231	Lys1386*	C	OI1	1	7.776
	48263224	Leu1388Arg	C	OI2	4	9.029
	48263158	Val1410Asp	C	OI3	3	7.227
	48263148	Asp1413Glu	C	OI1	1	-1.125
	48262993	Trp1422*	C	OI2	4	4.772
	48262984	Thr1425Ile	C	OI3	3	9.599
	48262966	Thr1431Ile	C	OI4	2	9.599
	48262948	Leu1437Gln	C	OI2	4	9.085
	48262942	Ile1439Thr	C	OI3/OI4	2	9.085
	48262937	Asp1441His	C	OI1	1	7.606
	48262937	Asp1441Tyr	C	OI2	4	7.606
	48262933	Val1442Gly	C	OI3	3	9.085
	48262927	Pro1444His	C	OI4	2	7.761
	48262915	Gly1448Asp	C	OI1/OI4	2	7.606
	48262915	Gly1448Val	C	OI3	3	7.606
	48262894	Gly1455Val	C	OI4	2	7.606
	48262883	Gly1459Arg	C	OI3	3	1.663
	NOTE: "Domain" refers to location of mutation in either N-terminal (N), Triple-Helix (T), or C-terminal (C) domains. "Disease" and "Severity Category" refers to the Leiden Open Variation Database, where category 1 is the least severe (see main text).

## Sheet: Table S3. Chimp COL1A haps 
Table S3. Chimpanzee COL1A1 haplotypes. COL1A1 haplotypes (as resolved by PHASE, see Methods and Materials) of the four chimpanzee subspecies from the "Pan genomes" dataset (de Manuel et al. 2016). Shown are SNPs within the ~17kb locus including approximate promoter region 2kb upstream, and 5' and 3' UTR. Nucleotides shaded in "blue" and "yellow" designate SNPs that are shared by at least two dif…
hg19 position	48280002	48279620	48279552	48279351	48276514	48276353	48275737	48275276	48275174	48275102	48274690	48274086	48274072	48274047	48273906	48273799	48273494	48273223	48271668	48270753	48270468	48270435	48270373	48270292	48269986	48269944	48269722	48269710	48269666	48269637	48269575	48269045	48267113	48266503	48263151	48263101	48263059	48263049	48262849	48262156	48262131
Human	T	A	C	C	T	T	T	T	T	T	C	A	C	C	T	G	C	T	C	C	C	C	C	G	C	G	G	C	T	C	G	G	C	G	C	C	A	C	C	G	C
Bonobo	T	A	C	C	T	T	T	T	G	C	C	A	C	A	T	G	C	T	C	C	C	C	C	G	C	G	G	C	C	T	G	G	C	G	C	C	A	C	C	A	C
Pan_troglodytes_verus-A991_Berta2	.	.	.	.	.	.	C	.	G	.	.	.	.	A	.	.	.	.	.	.	.	.	.	.	.	.	.	.	.	.	.	.	.	.	.	.	.	.	.	A	.
Pan_troglodytes_verus-N016_Alice1	.	.	.	.	.	.	C	.	G	.	.	.	.	A	.	.	.	.	.	.	.	.	.	.	.	.	.	.	.	.	.	.	.	.	.	.	.	.	.	A	.
Pan_troglodytes_verus-B005_SeppToni1	.	.	.	.	.	.	C	.	G	.	.	.	.	A	.	.	.	.	.	.	.	.	.	.	.	.	.	.	C	T	.	.	.	.	.	.	.	.	.	A	.
Pan_troglodytes_verus-A993_Mike1	.	.	.	.	.	.	C	.	G	.	.	.	.	A	.	T	.	.	.	.	.	.	.	.	.	.	.	.	C	T	.	.	.	.	.	.	.	.	.	A	.
Pan_troglodytes_verus-Clint1	.	.	.	.	.	.	C	.	G	.	.	.	.	A	.	T	.	.	.	.	.	.	.	.	.	.	.	.	C	T	.	.	.	.	.	.	.	.	.	A	.
Pan_troglodytes_verus-A992_Annie1	.	.	.	.	.	.	C	.	G	.	.	.	.	A	.	T	.	.	.	.	.	.	.	.	.	.	.	.	C	.	.	.	.	.	.	.	.	.	.	A	.
Pan_troglodytes_verus-A956_Jimmie2	.	.	.	.	.	.	C	.	G	.	.	.	.	A	.	.	.	.	.	.	.	.	.	.	.	.	.	T	C	T	.	.	.	.	.	.	.	.	.	A	.
Pan_troglodytes_verus-N016_Alice2	.	.	.	.	.	.	C	.	G	.	.	.	.	A	.	.	.	.	.	.	.	.	.	.	.	.	.	T	C	T	.	.	.	.	.	.	.	.	.	A	.
Pan_troglodytes_verus-B006_Linda1	.	.	.	.	.	.	C	.	G	.	.	.	.	A	.	.	.	.	.	.	.	.	.	.	.	.	.	T	C	T	.	.	.	.	.	.	.	.	.	A	.
Pan_troglodytes_verus-A992_Annie2	.	.	.	.	.	.	C	.	G	.	.	.	.	A	.	.	.	.	.	.	.	.	.	.	.	.	.	T	C	T	.	.	.	.	.	.	.	.	.	A	.
Pan_troglodytes_verus-N014_Cindy1	.	.	.	.	.	.	C	.	G	.	.	.	.	A	.	T	.	.	.	.	.	.	.	.	.	.	.	T	C	T	.	.	.	.	.	.	.	.	.	A	.
Pan_troglodytes_verus-9668_Bosco1	.	.	.	.	.	.	C	.	G	.	.	.	.	A	.	T	.	.	.	.	.	.	.	.	.	.	.	T	C	T	.	.	.	.	.	.	.	.	.	A	.
Pan_troglodytes_verus-B005_SeppToni2	A	C	.	.	C	C	.	A	.	.	.	.	.	A	C	.	.	.	.	.	.	.	.	.	.	.	.	.	C	T	.	.	.	.	.	.	.	.	.	A	.
Pan_troglodytes_verus-X00100_Koby1	A	C	.	.	C	C	.	A	.	.	.	.	.	A	C	.	.	.	.	.	.	.	.	.	.	.	.	T	.	.	.	.	.	A	.	.	G	T	T	.	T
Pan_troglodytes_verus-9730_Donald1	A	C	.	.	C	C	.	A	.	.	.	.	.	A	C	.	.	.	.	.	.	.	.	.	.	.	.	T	.	.	.	.	.	A	.	.	G	T	T	.	T
Pan_troglodytes_verus-9668_Bosco2	A	C	G	.	C	C	.	A	.	.	.	.	.	A	C	.	.	.	.	.	.	.	.	.	A	.	.	.	C	.	.	.	.	A	.	T	G	T	T	.	T
Pan_troglodytes_verus-Clint2	A	C	G	.	C	C	.	A	.	.	.	.	.	A	C	.	.	.	.	.	.	.	.	.	A	.	.	.	C	.	.	.	.	A	.	T	G	T	T	.	T
Pan_troglodytes_verus-N014_Cindy2	A	C	G	.	C	C	.	A	.	.	.	.	.	A	C	.	.	.	.	.	.	.	.	.	A	.	.	.	C	.	.	.	.	A	.	T	G	T	T	.	T
Pan_troglodytes_verus-X00100_Koby2	A	C	G	.	C	C	.	A	.	.	.	.	.	A	C	.	.	.	.	.	.	.	.	.	A	.	.	T	C	.	.	.	.	A	.	.	G	T	T	.	T
Pan_troglodytes_verus-A956_Jimmie1	A	C	G	.	C	C	.	A	.	.	.	.	.	A	C	.	.	.	.	.	.	.	.	.	A	.	.	T	C	.	.	.	.	A	.	.	G	T	T	.	T
Pan_troglodytes_verus-A991_Berta1	A	C	G	.	C	C	.	A	.	.	.	.	.	A	C	.	.	.	.	.	.	.	.	.	A	.	.	T	C	.	.	.	.	A	.	.	G	T	T	.	T
Pan_troglodytes_verus-B006_Linda2	A	C	G	.	C	C	.	A	.	.	.	.	.	A	C	.	.	.	.	.	.	.	.	.	A	.	.	T	C	.	.	.	.	A	.	.	G	T	T	.	T
Pan_troglodytes_verus-A993_Mike2	A	C	G	.	C	C	.	A	.	.	.	.	.	A	C	.	.	.	.	.	.	.	.	.	A	.	.	T	C	.	.	.	.	A	.	.	G	T	T	.	T
Pan_troglodytes_verus-9730_Donald2	A	C	G	.	C	C	.	A	.	.	.	.	.	A	C	.	.	.	.	.	.	.	.	.	.	.	.	T	.	.	.	.	.	A	.	.	G	T	T	.	T
Pan_troglodytes_ellioti-Julie1	.	.	.	.	.	.	.	.	G	.	.	.	.	A	.	.	.	.	.	.	.	.	.	.	.	.	.	.	C	T	.	.	.	.	.	.	.	.	.	A	.
Pan_troglodytes_ellioti-Koto2	.	.	.	.	.	.	.	.	G	.	.	.	.	A	.	.	.	.	.	G	.	.	.	.	.	.	.	.	C	T	.	.	.	.	.	.	.	.	.	A	.
Pan_troglodytes_ellioti-Basho1	.	.	.	.	.	.	.	.	G	.	.	.	.	A	.	.	.	.	.	G	.	.	.	.	.	.	.	.	C	T	.	.	.	.	.	.	.	.	.	A	.
Pan_troglodytes_ellioti-Akwaya_Jean1	.	.	.	.	.	.	.	.	G	.	.	.	.	A	.	.	.	.	.	G	.	.	.	.	.	.	.	.	C	T	.	.	.	.	.	.	.	.	.	A	.
Pan_troglodytes_ellioti-Banyo2	A	C	.	.	C	C	.	A	.	.	.	.	.	A	C	.	.	.	.	.	.	.	.	.	.	.	.	T	.	.	.	.	.	A	.	.	G	T	T	.	T
Pan_troglodytes_ellioti-Koto1	A	C	.	.	C	C	.	A	.	.	.	.	.	A	C	.	G	.	.	.	.	G	.	.	.	.	.	T	.	.	.	.	.	A	.	.	G	T	T	.	T
Pan_troglodytes_ellioti-Taweh1	A	C	.	.	C	C	.	A	.	.	.	.	.	A	C	.	G	.	.	.	.	G	.	.	.	.	.	T	.	.	.	.	.	A	.	.	G	T	T	.	T
Pan_troglodytes_ellioti-Kopongo2	A	C	.	G	C	C	.	A	.	T	.	.	.	A	C	.	.	.	.	.	.	.	T	.	.	.	.	T	.	.	.	.	.	A	.	.	G	T	T	.	T
Pan_troglodytes_ellioti-Taweh2	A	C	.	G	C	C	.	A	.	T	.	.	.	A	C	.	.	.	.	.	.	.	T	.	.	.	.	T	.	.	.	.	.	A	.	.	G	T	T	.	T
Pan_troglodytes_ellioti-Akwaya_Jean2	A	C	.	G	C	C	.	A	.	T	.	.	.	A	C	.	.	.	.	.	.	.	.	.	.	.	.	T	.	.	.	.	.	A	.	.	G	T	T	.	T
Pan_troglodytes_ellioti-Banyo1	A	C	.	G	C	C	.	A	.	T	.	.	.	A	C	.	.	.	.	.	.	.	.	.	.	.	.	T	.	.	.	.	.	A	.	.	G	T	T	.	T
Pan_troglodytes_ellioti-Damian1	A	C	.	G	C	C	.	A	.	T	.	.	.	A	C	.	.	.	.	.	.	.	.	.	.	.	.	T	.	.	.	.	.	A	.	.	G	T	T	.	T
Pan_troglodytes_ellioti-Damian2	A	C	.	G	C	C	.	A	.	T	.	.	.	A	C	.	.	.	.	.	.	.	.	.	.	.	.	T	.	.	.	.	.	A	.	.	G	T	T	.	T
Pan_troglodytes_ellioti-Paquita2	A	C	.	G	C	C	.	A	.	T	.	.	.	A	C	.	.	.	.	.	.	.	.	.	.	.	.	T	.	.	.	.	.	A	.	.	G	T	T	.	T
Pan_troglodytes_ellioti-Julie2	A	C	.	G	C	C	.	A	.	T	.	.	.	A	C	.	.	.	.	.	.	.	.	.	.	.	.	T	.	.	.	.	.	A	.	.	G	T	T	.	T
Pan_troglodytes_ellioti-Kopongo1	A	C	.	G	C	C	.	A	.	T	.	.	.	A	C	.	.	.	.	.	.	.	.	.	.	.	.	T	.	.	.	.	.	A	.	.	G	T	T	.	T
Pan_troglodytes_ellioti-Paquita1	A	C	.	G	C	C	.	A	.	T	.	.	.	A	C	.	.	.	.	.	.	.	.	.	.	.	.	T	.	.	.	.	.	A	.	.	G	T	T	.	T
Pan_troglodytes_ellioti-Tobi1	A	C	.	G	C	C	.	A	.	T	.	.	.	A	C	.	.	.	.	.	.	.	.	.	.	.	.	T	.	.	.	.	.	A	.	.	G	T	T	.	T
Pan_troglodytes_ellioti-Tobi2	A	C	.	G	C	C	.	A	.	T	.	.	.	A	C	.	.	.	.	.	.	.	.	.	.	.	.	T	.	.	.	.	.	A	.	.	G	T	T	.	T
Pan_troglodytes_ellioti-Basho2	A	C	.	G	C	C	.	A	.	T	.	.	.	A	C	.	.	.	.	.	.	.	.	.	.	.	.	T	.	.	.	.	.	A	.	.	.	.	T	.	T
Pan_troglodytes_troglodytes-12311_Ula2	.	.	.	.	.	.	.	.	G	.	.	.	.	A	.	.	.	.	.	G	.	.	.	.	.	.	.	.	C	T	.	.	.	.	.	.	.	.	.	A	.
Pan_troglodytes_troglodytes-10964_Cindy1	.	.	.	.	.	.	.	.	G	.	.	.	.	A	.	.	.	.	.	G	.	.	.	.	.	.	.	.	C	T	.	.	.	.	.	.	.	.	.	A	.
Pan_troglodytes_troglodytes-13656_Brigitte2	.	.	.	.	.	.	.	.	G	.	.	.	.	A	.	.	.	.	.	G	.	.	.	.	.	.	.	.	C	T	.	.	.	.	.	.	.	.	.	A	.
Pan_troglodytes_troglodytes-B022_Tibe1	.	.	.	.	.	.	.	.	G	.	.	.	.	A	.	.	.	.	.	G	.	.	.	.	.	.	.	.	C	T	.	.	.	.	.	.	.	.	.	A	.
Pan_troglodytes_troglodytes-B024_Negrita2	.	.	.	.	.	.	.	.	G	.	.	.	.	A	.	.	.	.	.	G	.	.	.	.	.	.	.	.	C	T	.	.	.	.	.	.	.	.	.	A	.
Pan_troglodytes_troglodytes-A957_Vaillant2	.	.	.	.	.	.	.	.	G	.	.	.	.	A	.	.	.	.	.	G	.	.	.	.	.	.	.	.	C	T	.	.	.	.	.	.	.	.	.	A	.
Pan_troglodytes_troglodytes-A990_Noemie2	.	.	.	.	.	.	.	.	G	.	.	.	.	A	.	.	.	.	.	G	.	.	.	.	.	.	.	.	C	T	.	.	.	.	.	.	.	.	.	A	.
Pan_troglodytes_troglodytes-11352_Mirinda1	.	.	.	.	.	.	.	.	G	.	.	.	.	A	.	.	.	.	.	.	.	.	.	.	.	.	.	.	C	T	.	.	.	.	.	.	.	.	.	A	.
Pan_troglodytes_troglodytes-A959_Julie2	.	.	.	.	.	.	.	.	G	.	A	.	.	A	.	.	.	.	.	.	.	.	.	.	.	A	.	.	C	T	.	.	.	.	.	.	.	.	.	A	.
Pan_troglodytes_troglodytes-11528_Alfred2	.	.	.	.	.	.	.	.	G	.	A	.	.	A	.	.	.	.	.	.	.	.	.	.	.	.	A	.	C	T	.	.	.	.	T	.	.	.	.	A	.
Pan_troglodytes_troglodytes-B021_Yogui2	.	.	.	.	.	.	.	.	G	.	A	.	.	A	.	.	.	.	.	.	.	.	.	.	.	.	A	.	C	T	.	.	.	.	T	.	.	.	.	A	.
Pan_troglodytes_troglodytes-B022_Tibe2	.	.	.	.	.	.	.	.	G	.	A	.	.	A	.	.	.	.	.	.	.	.	.	.	.	.	A	.	C	T	.	.	.	.	T	.	.	.	.	A	.
Pan_troglodytes_troglodytes-B023_Blanquita2	.	.	.	.	.	.	.	.	G	.	A	.	.	A	.	.	.	.	.	.	.	.	.	.	.	.	A	.	C	T	.	.	.	.	T	.	.	.	.	A	.
Pan_troglodytes_troglodytes-12348_Luky2	.	.	.	.	.	.	.	.	G	.	A	.	.	A	.	.	.	.	.	.	.	.	.	.	.	.	.	.	C	T	.	.	.	.	T	.	.	.	.	A	.
Pan_troglodytes_troglodytes-A958_Doris1	.	.	.	.	.	.	C	.	G	.	.	.	.	A	.	.	.	.	.	.	.	.	.	.	.	A	.	.	C	T	.	.	.	.	.	.	.	.	.	A	.
Pan_troglodytes_troglodytes-12320_Lara2	.	.	.	.	.	.	C	.	G	.	.	.	.	A	.	.	.	.	.	.	.	.	.	.	.	.	.	.	C	T	.	.	.	.	.	.	.	.	.	A	.
Pan_troglodytes_troglodytes-12420_Gamin1	.	.	.	.	.	.	C	.	G	.	.	.	.	A	.	.	.	.	.	.	.	.	.	.	.	.	.	.	C	T	.	.	.	.	.	.	.	.	.	A	.
Pan_troglodytes_troglodytes-A957_Vaillant1	.	.	.	.	.	.	C	.	G	.	.	.	.	A	.	.	.	.	.	.	.	.	.	.	.	.	.	.	C	T	.	.	.	.	.	.	.	.	.	A	.
Pan_troglodytes_troglodytes-11528_Alfred1	.	.	.	.	.	.	C	.	G	.	.	.	.	A	.	.	.	.	.	.	.	.	.	.	.	.	.	.	C	T	A	.	.	.	.	.	.	.	.	A	.
Pan_troglodytes_troglodytes-12320_Lara1	.	.	.	.	.	.	C	.	G	.	.	.	.	A	.	.	.	.	.	.	.	.	.	.	.	.	.	.	C	T	A	.	.	.	.	.	.	.	.	A	.
Pan_troglodytes_troglodytes-13656_Brigitte1	.	.	.	.	.	.	C	.	G	.	.	.	.	A	.	.	.	.	.	.	.	.	.	.	.	.	.	.	C	T	A	.	.	.	.	.	.	.	.	A	.
Pan_troglodytes_troglodytes-A960_Clara1	.	.	.	.	.	.	C	.	G	.	.	.	.	A	.	.	.	.	.	.	.	.	.	.	.	.	.	.	C	T	A	.	.	.	.	.	.	.	.	A	.
Pan_troglodytes_troglodytes-11352_Mirinda2	.	.	.	.	.	.	.	.	G	.	.	.	.	A	.	.	.	.	.	.	.	.	.	A	.	.	.	.	C	T	.	.	.	.	.	.	.	.	.	A	.
Pan_troglodytes_troglodytes-B025_Marlin1	.	.	.	.	.	.	.	.	G	.	.	.	.	A	C	.	.	.	.	.	.	.	.	.	.	.	.	.	C	T	.	.	.	.	.	.	.	.	.	A	.
Pan_troglodytes_troglodytes-12311_Ula1	.	.	.	.	.	.	.	.	G	.	.	.	G	.	C	.	.	A	.	.	.	.	.	A	.	.	.	.	C	T	.	.	.	.	.	.	.	.	.	A	.
Pan_troglodytes_troglodytes-A958_Doris2	.	.	.	.	.	.	.	.	G	.	.	.	G	.	C	.	.	A	.	.	.	.	.	A	.	.	.	.	C	T	.	.	.	.	.	.	.	.	.	A	.
Pan_troglodytes_troglodytes-A990_Noemie1	.	.	.	.	.	.	.	.	G	.	.	.	G	.	C	.	.	A	.	.	.	.	.	A	.	.	.	.	C	T	.	.	.	.	.	.	.	.	.	A	.
Pan_troglodytes_troglodytes-B021_Yogui1	.	.	.	.	.	.	.	.	G	.	.	.	G	.	C	.	.	A	.	.	.	.	.	A	.	.	.	.	C	T	.	.	.	.	.	.	.	.	.	A	.
Pan_troglodytes_troglodytes-B023_Blanquita1	.	.	.	.	.	.	.	.	G	.	.	.	G	.	C	.	.	A	.	.	.	.	.	A	.	.	.	.	C	T	.	.	.	.	.	.	.	.	.	A	.
Pan_troglodytes_troglodytes-B024_Negrita1	.	.	.	.	.	.	.	.	G	.	.	.	G	.	C	.	.	A	.	.	.	.	.	A	.	.	.	.	C	T	.	.	.	.	.	.	.	.	.	A	.
Pan_troglodytes_troglodytes-A960_Clara2	.	.	.	.	C	.	.	.	G	.	A	.	.	A	.	.	.	.	.	.	.	.	.	.	.	.	.	.	C	T	.	.	.	.	T	.	.	.	.	A	.
Pan_troglodytes_troglodytes-12420_Gamin2	A	C	.	.	C	C	.	.	.	.	.	.	.	A	C	.	.	.	G	.	.	.	.	.	.	.	.	T	.	.	.	T	.	.	.	.	.	.	.	A	.
Pan_troglodytes_troglodytes-A959_Julie1	A	C	.	.	C	C	.	.	.	.	.	.	.	A	C	.	.	.	G	.	.	.	.	.	.	.	.	T	.	.	.	T	.	.	.	.	.	.	.	A	.
Pan_troglodytes_troglodytes-10964_Cindy2	A	C	.	.	C	C	.	A	.	.	.	.	.	A	C	.	.	.	.	.	.	.	.	.	.	.	.	T	.	.	.	.	.	A	.	.	G	T	T	.	T
Pan_troglodytes_troglodytes-12348_Luky1	A	C	.	.	C	C	.	A	.	.	.	.	.	A	C	.	.	.	.	.	.	.	.	.	.	.	.	T	.	.	.	.	.	A	.	.	G	T	T	.	T
Pan_troglodytes_troglodytes-B025_Marlin2	A	C	.	.	C	C	.	A	.	.	.	.	.	A	C	.	.	.	.	.	.	.	.	.	.	.	.	T	.	.	.	.	.	A	.	.	G	T	T	.	T
Pan_troglodytes_schweinfurthii-B010_Ikuru2	.	.	.	.	.	.	.	.	G	.	.	.	.	A	.	.	.	.	.	.	.	.	.	.	.	.	.	.	C	T	.	.	.	.	.	.	.	.	.	A	.
Pan_troglodytes_schweinfurthii-A996_Diana2	.	.	.	.	.	.	.	.	G	.	.	.	.	A	.	.	.	.	.	.	.	.	.	.	.	.	.	.	C	T	.	.	.	.	.	.	.	.	.	A	.
Pan_troglodytes_schweinfurthii-B010_Ikuru1	.	.	.	.	.	.	.	.	G	.	.	.	.	A	.	.	.	.	.	.	.	.	.	.	.	.	.	.	C	T	.	.	.	.	.	.	.	.	.	A	.
Pan_troglodytes_schweinfurthii-A912_Nakuu1	.	.	.	.	.	.	.	.	G	.	.	.	.	A	.	.	.	.	.	.	.	.	.	.	.	.	.	.	C	T	.	.	T	.	.	.	.	.	.	A	.
Pan_troglodytes_schweinfurthii-B013_Athanga1	.	.	.	.	.	.	.	.	G	.	.	.	.	A	.	.	.	.	.	.	.	.	.	.	.	.	.	.	C	T	.	.	T	.	.	.	.	.	.	A	.
Pan_troglodytes_schweinfurthii-B013_Athanga2	.	.	.	.	.	.	.	.	G	.	.	.	.	A	.	.	.	.	.	.	.	.	.	.	.	.	.	.	C	T	.	.	T	.	.	.	.	.	.	A	.
Pan_troglodytes_schweinfurthii-100037_Vincent1	.	.	.	.	.	.	.	.	G	.	.	.	.	A	.	.	.	.	.	.	.	.	.	.	.	.	.	.	C	T	.	.	T	.	.	.	.	.	.	A	.
Pan_troglodytes_schweinfurthii-A912_Nakuu2	.	.	.	.	.	.	.	.	G	.	.	.	.	A	.	.	.	.	.	.	.	.	.	.	.	.	.	.	C	T	.	.	T	.	.	.	.	.	.	A	.
Pan_troglodytes_schweinfurthii-100040_Andromeda2	.	.	.	.	.	.	.	.	G	.	.	.	.	A	.	.	.	.	.	.	.	.	.	.	.	.	.	.	C	T	.	.	T	.	.	.	.	.	.	A	.
Pan_troglodytes_schweinfurthii-B002_Padda2	.	.	.	.	.	.	.	.	G	.	.	.	.	A	.	.	.	.	.	.	.	.	.	.	.	.	.	.	C	T	.	.	T	.	.	.	.	.	.	A	.
Pan_troglodytes_schweinfurthii-B011_Frederike2	.	.	.	.	.	.	.	.	G	.	.	.	.	A	.	.	.	.	.	.	.	.	.	.	.	.	.	.	C	T	.	.	T	.	.	.	.	.	.	A	.
Pan_troglodytes_schweinfurthii-B012_Washu2	.	.	.	.	.	.	.	.	G	.	.	.	.	A	.	.	.	.	.	.	.	.	.	.	.	.	.	.	C	T	.	.	T	.	.	.	.	.	.	A	.
Pan_troglodytes_schweinfurthii-N019_Maya1	.	.	.	.	.	.	.	.	G	.	.	.	.	A	.	.	.	.	.	.	.	.	.	.	.	.	.	.	C	T	.	.	T	.	.	.	.	.	.	A	.
Pan_troglodytes_schweinfurthii-B014_Coco2	.	.	.	.	.	.	.	.	G	.	.	.	.	A	.	.	.	.	.	.	.	.	.	.	.	.	.	.	C	T	.	.	T	.	.	.	.	.	.	A	.
Pan_troglodytes_schweinfurthii-100037_Vincent2	.	.	.	.	.	.	.	.	G	.	.	.	.	A	.	.	.	.	.	.	A	.	.	.	.	.	.	.	C	T	.	.	T	.	.	.	.	.	.	A	.
Pan_troglodytes_schweinfurthii-N019_Maya2	.	.	.	.	.	.	.	.	G	.	.	.	.	A	.	.	.	.	.	.	A	.	.	.	.	.	.	.	C	T	.	.	T	.	.	.	.	.	.	A	.
Pan_troglodytes_schweinfurthii-A996_Diana1	.	.	.	.	.	.	C	.	G	.	.	.	.	A	.	.	.	.	.	.	.	.	.	.	.	.	.	.	C	T	.	.	.	.	.	.	.	.	.	A	.
Pan_troglodytes_schweinfurthii-100040_Andromeda1	.	.	.	.	.	.	C	.	G	.	.	.	.	A	.	.	.	.	.	.	.	.	.	.	.	.	.	.	C	T	.	.	.	.	.	.	.	.	.	A	.
Pan_troglodytes_schweinfurthii-A910_Bwambale1	.	.	.	.	.	.	C	.	G	.	.	.	.	A	.	.	.	.	.	.	.	.	.	.	.	.	.	.	C	T	.	.	.	.	.	.	.	.	.	A	.
Pan_troglodytes_schweinfurthii-A910_Bwambale2	.	.	.	.	.	.	C	.	G	.	.	.	.	A	.	.	.	.	.	.	.	.	.	.	.	.	.	.	C	T	.	.	.	.	.	.	.	.	.	A	.
Pan_troglodytes_schweinfurthii-B012_Washu1	.	.	.	.	.	.	C	.	G	.	.	.	.	A	.	.	.	.	.	.	.	.	.	.	.	.	.	.	C	T	.	.	.	.	.	.	.	.	.	A	.
Pan_troglodytes_schweinfurthii-Mgbadolite1	.	.	.	.	.	.	C	.	G	.	.	.	.	A	.	.	.	.	.	.	.	.	.	.	.	.	.	.	C	T	.	.	.	.	.	.	.	.	.	A	.
Pan_troglodytes_schweinfurthii-N015_Cleo1	.	.	.	.	.	.	C	.	G	.	.	.	.	A	.	.	.	.	.	.	.	.	.	.	.	.	.	.	C	T	.	.	.	.	.	.	.	.	.	A	.
Pan_troglodytes_schweinfurthii-N017_Bihati1	.	.	.	.	.	.	C	.	G	.	.	.	.	A	.	.	.	.	.	.	.	.	.	.	.	.	.	.	C	T	.	.	.	.	.	.	.	.	.	A	.
Pan_troglodytes_schweinfurthii-B014_Coco1	.	.	.	.	.	.	C	.	G	.	.	.	.	A	.	.	.	.	.	.	.	.	.	.	.	.	.	.	C	T	.	.	.	.	.	.	.	.	.	A	.
Pan_troglodytes_schweinfurthii-N018_Trixie2	.	C	.	.	C	C	.	.	.	.	.	.	.	A	C	.	.	.	G	.	.	.	.	.	.	.	.	T	.	.	.	T	.	.	.	.	.	.	.	A	.
Pan_troglodytes_schweinfurthii-A911_Kidongo1	A	C	.	.	C	C	.	.	.	.	.	.	.	A	C	.	.	.	G	.	.	.	.	.	.	.	.	T	.	.	.	.	.	.	.	.	.	.	.	A	.
Pan_troglodytes_schweinfurthii-N018_Trixie1	A	C	.	.	C	C	.	.	.	.	.	.	.	A	C	.	.	.	G	.	.	.	.	.	.	.	.	T	.	.	.	T	.	.	.	.	.	.	.	A	.
Pan_troglodytes_schweinfurthii-9729_Harriet1	A	C	.	.	C	C	.	.	.	.	.	.	.	A	C	.	.	.	G	.	.	.	.	.	.	.	.	T	.	.	.	T	.	.	.	.	.	.	.	A	.
Pan_troglodytes_schweinfurthii-9729_Harriet2	A	C	.	.	C	C	.	.	.	.	.	.	.	A	C	.	.	.	G	.	.	.	.	.	.	.	.	T	.	.	.	T	.	.	.	.	.	.	.	A	.
Pan_troglodytes_schweinfurthii-B002_Padda1	A	C	.	.	C	C	.	.	.	.	.	.	.	A	C	.	.	.	G	.	.	.	.	.	.	.	.	T	.	.	.	T	.	.	.	.	.	.	.	A	.
Pan_troglodytes_schweinfurthii-N013_Tongo1	A	C	.	.	C	C	.	.	.	.	.	.	.	A	C	.	.	.	G	.	.	.	.	.	.	.	.	T	.	.	.	T	.	.	.	.	.	.	.	A	.
Pan_troglodytes_schweinfurthii-N013_Tongo2	A	C	.	.	C	C	.	.	.	.	.	.	.	A	C	.	.	.	G	.	.	.	.	.	.	.	.	T	.	.	.	T	.	.	.	.	.	.	.	A	.
Pan_troglodytes_schweinfurthii-N015_Cleo2	A	C	.	.	C	C	.	.	.	.	.	.	.	A	C	.	.	.	G	.	.	.	.	.	.	.	.	T	.	.	.	T	.	.	.	.	.	.	.	A	.
Pan_troglodytes_schweinfurthii-N017_Bihati2	A	C	.	.	C	C	.	.	.	.	.	.	.	A	C	.	.	.	G	.	.	.	.	.	.	.	.	T	.	.	.	T	.	.	.	.	.	.	.	A	.
Pan_troglodytes_schweinfurthii-B011_Frederike1	A	C	.	.	C	C	.	.	.	.	.	.	.	A	C	.	.	.	G	.	.	.	.	.	.	.	.	T	.	.	.	T	.	.	.	.	.	.	.	A	.
Pan_troglodytes_schweinfurthii-A911_Kidongo2	A	C	.	.	C	C	.	.	.	.	.	G	.	A	C	.	.	.	G	.	.	.	.	.	.	.	.	T	.	.	.	T	.	.	.	.	.	.	.	A	.
Pan_troglodytes_schweinfurthii-Mgbadolite2	A	C	.	.	C	C	.	.	.	.	.	G	.	A	C	.	.	.	G	.	.	.	.	.	.	.	.	T	.	.	.	T	.	.	.	.	.	.	.	A	.

## Sheet: Table S4. Chimp data
	Table S4. COL1A1 nucleotide diversity in 40 western chimpanzee sequences
	Gene region	# of bp	Sa	θ (%)b
	Total	16989	92	0.127
	Promoter	1223	4	0.077
	5' and 3' UTR	263	1	0.089
	Intronsc	10932	75	0.161
	Replacementd	3168	0	0
	aNumber of SNPs in 40 allele copies
	bWatterson's (1975) estimate of nucleotide diversity (%)
	cSites in 50 introns minus 5'/3' splice sites
	dAmino acid replacement sites

## Sheet: Table S5. Chimp frags
	Table S5. Chimpanzee nucleotide diversity in non-coding regions upstream and downstream of COL1A1
	Region	Fragment	Chr17 coordinates (hg19)	# of bp	Sa	θ (%)b	C-H Divergence (%)c	C-B Divergence (%)d
	upstream	1	48366669 - 48368592	1748	4	0.0537982	1.03	0.4
		2	48358884 - 48360189	1273	0	0	1.021	0.236
		3	48346932 - 48348609	1316	3	0.0535938	1.178	0.337
		4	48344155 - 48345481	1260	3	0.0559758	0.873	0
		5	48312873 - 48314134	1030	2	0.0456502	1.845	0.194
		6	48305194 - 48306800	1337	8	0.140672	1.047	0.15
		7	48296691 - 48300522	3430	14	0.0959585	0.583	0.379
		8	48292713 - 48294373	1271	4	0.0739884	0.708	0.157
		9	48289799 - 48291088	1171	7	0.140537	1.025	0.171
		total		13836	45	0.076463	0.938	0.252
	downstream	10	48252243 - 48253712	918	3	0.0768295	1.198	0.109
		11	48250354 - 48251670	1161	2	0.0404993	0.775	0.172
		12	48248552 - 48250111	1479	10	0.158958	1.082	0.203
		13	48244783 - 48248636	2790	12	0.101118	0.932	0.215
		14	48241719 - 48243937	1141	6	0.123627	0.53	0.61
		15	48234847 - 48236311	1432	4	0.0656699	0.559	0.07
		16	48224895 - 48226191	1198	1	0.0196242	0.584	0
		17	48208940 - 48211018	1941	3	0.0363367	0.567	0.309
		18	48195902 - 48197222	1301	1	0.0180706	0.922	0
		19	48190350 - 48191999	1298	4	0.0724494	0.539	0.385
		20	48188259 - 48190134	1612	9	0.131258	0.931	0.062
		total		16271	55	0.079469	0.79	0.211
	aNumber of SNPs in 40 allele copies
	bWatterson's (1975) estimate of nucleotide diversity (%)
	cChimpanzee-Human divergence as number of pairwise differences per nucleotide (%)
	dChimpanzee-Bonobo divergence as number of pairwise differences per nucleotide (%)

## Sheet: Table S6. Bonobo frags
	Table S6. Bonobo nucleotide diversity in non-coding regions upstream and downstream of COL1A1
	Region	Fragment	Chr17 coordinates (hg19)	# of bp	Sa	θ (%)b	B-H Divergence (%)c	C-B Divergence (%)d
	upstream	1	48366669 - 48368592	1748	2	0.0299834	1.087	0.4
		2	48358884 - 48360189	1273	3	0.0617568	1.02	0.236
		3	48346932 - 48348609	1316	6	0.119478	1.34	0.337
		4	48344155 - 48345481	1260	3	0.0623939	0.873	0
		5	48312873 - 48314134	1030	4	0.101769	2.039	0.194
		6	48305194 - 48306800	1337	9	0.176402	0.972	0.15
		7	48296691 - 48300522	3430	11	0.0840408	0.845	0.379
		8	48292713 - 48294373	1271	4	0.0824719	0.787	0.157
		9	48289799 - 48291088	1171	2	0.0447574	0.854	0.171
		total		13836	44	0.0833362	1.022	0.252
	downstream	10	48252243 - 48253712	918	0	0	1.307	0.109
		11	48250354 - 48251670	1161	3	0.0677143	0.947	0.172
		12	48248552 - 48250111	1479	5	0.0885918	1.014	0.203
		13	48244783 - 48248636	2790	7	0.0657484	1.039	0.215
		14	48241719 - 48243937	1141	1	0.0229671	0.567	0.61
		15	48234847 - 48236311	1432	2	0.0365998	0.628	0.07
		16	48224895 - 48226191	1198	3	0.065623	0.584	0
		17	48208940 - 48211018	1941	7	0.094507	0.567	0.309
		18	48195902 - 48197222	1301	2	0.0402851	0.922	0
		19	48190350 - 48191999	1298	4	0.0807564	0.77	0.385
		20	48188259 - 48190134	1612	8	0.130052	0.868	0.062
		total		16271	42	0.0676436	0.953	0.211
	aNumber of SNPs in 26 allele copies
	bWatterson's (1975) estimate of nucleotide diversity (%)
	cBonobo-Human divergence as number of pairwise differences per nucleotide (%)
	dChimpanzee-Bonobo divergence as number of pairwise differences per nucleotide (%)

## Sheet: Table S7. aa SNPs by pop
	Table S7. Human COL1A1 amino acid variants in the 1000 Genomes Project
						Allele Frequency (%)
	Chr17 position (hg19)	ID	Change	Domain	PhyloP	ACB	ASW	BEB	CDX	CEU	CHB	CHS	CLM	ESN	FIN	GBR	GIH	GWD	IBS	ITU	JPT	KHV	LWK	MSL	MXL	PEL	PJL	PUR	STU	TSI	YRI
	48278804	rs201920416	Glu24Gly	N	1.238					0.505051
	48277279	rs546629502	Leu45Val	N	0.957																						0.520833
	48277259	rs533165364	Asp51Glu	N	-0.211														0.46729
	48277234	rs544922468	Ile60Phe	N	3.467												0.485437
	48276656	.	Ile134Met	N	0.766	0.520833
	48276631	rs570526849	Pro143Ser	N	9.109																	0.505051
	48275820	rs193922157	Gly173Arg	N	3.64							0.47619
	48275808	rs537060488	Val177Met	N	0.982																			0.588235
	48275526	rs533106127	Ala195Val	T	4.714																						0.520833
	48275339	rs72667032	Pro205Ala	T	5.201					0.505051			1.59574		0.505051	1.0989											0.520833		0.490196
	48275130	rs200142836	Arg220Gln	T	4.902																										0.462963
	48274420	rs559590117	Ala252Val	T	5.691												0.485437
	48274400	rs532554893	Ala259Thr	T	2.136					0.505051
	48273886	rs72645341	Glu288Lys	T	7.752																							0.480769
	48272960	rs567855944	Pro375Ala	T	3.047																	0.505051
	48272827	rs116794104	Ala390Thr	T	0.475	0.520833	1.63934						0.531915	1.0101									1.51515								1.38889
	48272643	rs72648327	Pro417Ser	T	3.921																				0.78125
	48272640	rs571929222	Ser418Thr	T	1.622																							0.480769
	48272634	rs558332963	Pro420Ser	T	6.201	0.520833
	48271741	rs144751329	Arg528His	T	3.155														0.46729
	48271522	rs562574340	Ser546Ile	T	3.133	0.520833
	48271396	rs558173513	Ala559Thr	T	0.089												0.485437
	48270195	rs557118570	Asp613Gly	T	6.099			0.581395
	48270048	rs113950465	Ala628Thr	T	1.563																							0.961538
	48269364	rs563598815	Ala669Thr	T	3.012			0.581395						0.505051								0.505051
	48269222	rs573132397	Arg685His	T	4.859																								0.980392
	48269217	rs553233250	Val687Met	T	4.918																								0.490196
	48268812	rs150803124	Ala723Thr	T	2.024															0.980392									0.980392
	48268811	rs561374961	Ala723Val	T	3.997			1.16279												0.490196							0.520833
	48267734	rs556916354	Arg802His	T	4.698																							0.480769
	48267439	rs199510546	Glu828Lys	T	7.773																0.480769
	48266893	rs538224838	Ala892Pro	T	0.199														0.46729
	48266851	rs145446512	Gly906Ser	T	-0.073								0.531915											0.588235
	48266814	rs181824088	Arg918His	T	4.808										0.505051
	48266797	rs200990242	Pro924Ser	T	0.382																		1.0101
	48266328	rs548928043	Arg994His	T	5.857																				0.78125
	48266141	rs139593707	Glu1021Gln	T	7.575		0.819672
	48265991	rs540596243	Arg1036His	T	7.734																0.480769
	48265968	rs558106162	Pro1044Ser	T	1.972																								0.490196
	48265959	rs544409032	Ala1047Pro	T	2.747												0.970874
	48265929	rs575285203	Val1057Ile	T	3.043																					0.588235
	48265495	rs1800215	Ala1075Thr	T	0.572	5.20833	5.7377			3.53535			1.06383	7.07071	4.0404	2.1978	0.485437	3.9823	0.46729				5.55556	5.88235			0.520833	0.480769	0.490196	2.33645	5.55556
	48264244	rs142570406	Pro1191Ala	T	2.899									0.505051											0.78125
	48264135	rs543809032	Arg1227His	C	1.823												0.485437
	48264082	rs199514372	Ile1245Phe	C	2.123					0.505051
	48264078	rs376524129	Arg1246Gln	C	0.801				0.537634
	48264049	rs148216434	Ala1256Thr	C	7.511				0.537634		0.485437	0.47619										1.0101
	48264006	rs572950705	Lys1270Thr	C	1.635	0.520833
	48263834	rs199911681	Asn1283Lys	C	0.419													0.442478						1.17647
	48263785	rs192986202	Val1300Met	C	0.234								0.531915
	48263769	rs201746814	Pro1305Leu	C	2.017																0.480769
	48263718	rs138544681	Arg1322Lys	C	1.944	0.520833								0.505051										0.588235
	48263701	rs142128554	Glu1328Lys	C	7.545																									0.46729
	48263695	rs201070506	Met1330Val	C	7.759																0.480769
	48263369	rs147936946	Gly1340Ser	C	-0.063										1.0101
	48263357	rs371547661	Asp1344Asn	C	1.141													0.442478				0.505051
	48263348	rs191166865	Asp1347Asn	C	3.854							0.47619										0.505051
	48263206	rs147266928	Asn1394Ser	C	4.045																									1.40187
	48262886	rs138557594	Val1458Ile	C	-1.663														0.46729
	48262871	rs577626107	Phe1463Leu	C	9.085															1.47059							0.520833		0.490196
	NOTE: "Domain" refers to location of mutation in either N-terminal (N), Triple-Helix (T), or C-terminal (C) domains. See Table S1 for population abbreviations. Highlighted rows show amino acid variants (14 of 60) that are shared across at least two population samples.

## Sheet: Table S8. SNP MAF dist
	Table S8. 1000 Genomes Project distributions of COL1A1 intron SNPs and amino acid variants
		Global (n=5008)		African ancestry (n=1322)		Non-African ancestry (n=3686)
	MAF	intron	amino acid	intron	amino acid	intron	amino acid
	0-.1	305	55	78	11	229	44
	.1-.5	55	4	36	3	57	5
	.5-1	19	0	14	1	10	1
	1-5	24	1	27	0	12	0
	5-10	7	0	12	1	6	0
	10-20	9	0	10	0	6	0
	20-30	9	0	10	0	9	0
	30-40	3	0	2	0	5	0
	40-50	5	0	9	0	3	0
	total	436	60	198	16	337	50
	NOTE: Sample sizes of "n" refer to the number of allele copies per population, see Table S1 for more information on the ancestry of the samples. Data refer to counts of SNPs within each MAF bin that are found at intron and amino acid replacement sites.

## Sheet: Table S9. DAMs shared
	Table S9. COL1A1 amino acid SNPs shared between 1000 Genomes and DAM databases
	Chr17 position (hg19)	Amino acid change	Domain	Disease	Severity Category	PhyloP	1000 Genomes Populations
	48275820	Gly173Arg	N	OI1	1	3.64	CHS
	48275131	Arg220Gln	T	OI1	1	9.762	YRI
	48273886	Glu288Lys	T	OI1	1	7.752	PUR
	48272827	Ala390Thr	T	OI2, skeletal dysplasia	4	0.475	ACB, ASW, CLM, ESN, LWK, YRI
	48272643	Pro417Ala	T	OI1	1	3.921	MXL
	48268811	Ala723Val	T	OI4	2	3.997	ITU, STU
	NOTE: "Domain" refers to location of mutation in either N-terminal (N), Triple-Helix (T), or C-terminal (C) domains. "Disease" and "Severity Category" refers to the Leiden Open Variation Database, where category 1 is the least severe (see main text). See Table S1 for population abbreviations.

## Sheet: Table S10. PhyloP freq dist
	Table XX.
	Table S10. PhyloP score distributions and comparisons for different COL1A1 datasets
		Gene			DAMs						1000 Genomes SNPs
	PhyloP interval	intron	coding		aa	cat1	cat2	cat3	cat4		intron	aa
	10.00 to 7.75	13	640		123	27	23	20	53		0	5
	7.75 to 5.50	55	1023		215	37	48	26	104		0	8
	5.50 to 3.25	110	665		44	19	11	7	7		1	13
	3.25 to 1.00	1108	837		28	21	3	2	2		30	19
	1.00 to -1.25	8740	1123		12	7	1	2	2		327	14
	-1.25 to -3.50	1267	87		0	0	0	0	0		75	1
	-3.50 to -5.75	114	14		0	0	0	0	0		2	0
	5.75 to -8.00	10	2		0	0	0	0	0		1	0
	total	11417	4391		422	111	86	57	168		436	60
	NOTE: Multiple datasets' distributions of PhyloP intervals are shown. Scores are shown for: sites in intron (except splice sites at 5' and 3' ends) and amino acid coding regions; sites underlying amino acid replacement (aa) SNPs in the DAMs dataset (see Table S2), broken down into different bone-related disease phenotypes of categories 1-4, with category 1 being least severe; sites underlying int…

[truncated: 8 more sheets: Table S11. Dist stat tests, Table S12. PhyloP domains-cats, Table S13. Triple-helix Gly, Table S14. MK tests, Table S15. Human FST, Table S16. Phased SNPs, Table S17. Western COL1A1, Table S18. COL1A1 resequencing]
